# Supplementary material for: The Primacy of High B-Value 3T-DWI Radiomics in the Prediction of Clinically Significant Prostate Cancer
Source: MDPI journal article supplement (doi:10.3390/diagnostics11050739), 2021-04-21
Supplement: s1 [file s1]

# Electronic Supplementary Material 1

## Radiomic Features Generation

First, the following 7 statistical descriptors were computed on *local* windows (LW) centred in each pixel  $x_i$  of the DWI<sub>b2000</sub> Region of Interest (ROI), whether ROI is the PCa lesion, thus achieving 7 parametric maps (PM) of local features. In that case, the symbol of feature is followed by subscript 'L', standing for local. Second, 12 statistical descriptors, including the 7 abovementioned, were computed globally, on each of the whole 7 PM.  $\Omega$  represents the domain where the features were computed on, and it can be either a LW, or the whole PM, and N is the number of pixels in  $\Omega$ . The in-house software used was written in MATLAB® (R2018b v.9.5, The MathWorks, Natick, MA, USA).

From 1. to 7.,  $\Omega$ : LW or whole PM,  $x_i \in \Omega$ ,  $i=1..N$

$$E_L, E : \text{entropy} = - \sum_i p_{x_i} \log p_{x_i} \quad (1)$$

where  $p_{x_i}$  is the probability of each pixel value  $x_i \in \Omega$

$$S_L, S : \text{skewness} = \frac{\frac{1}{N} \sum_i (x_i - \bar{x})^3}{\left( \frac{1}{N} \sum_i (x_i - \bar{x})^2 \right)^{3/2}} \quad (2)$$

$$K_L, K : \text{kurtosis} = \frac{\frac{1}{N} \sum_i (x_i - \bar{x})^4}{\left( \frac{1}{N} \sum_i (x_i - \bar{x})^2 \right)^2} - 3 \quad (3)$$

$$m_L, m : \text{mean} = \frac{1}{N} \sum_i x_i \quad (4)$$

$$M_L, M : \text{median} = x_{\lfloor \frac{N}{2} \rfloor}, f_c = \frac{\sum_i N p_{x_i}}{2} \quad (5)$$

$$CV_L, CV : \text{Coefficient of Variation} = \frac{\frac{1}{N} \sum_i x_i}{\sqrt{\frac{\sum_i (x_i - \bar{x})^2}{N}}} \quad (6)$$

$$IQR_L, IQR : \text{InterQuartile Range} = \text{median}_{upper\ half} - \text{median}_{lower\ half} \quad (6)$$

The following 5 statistical descriptors were computed globally on each of the 7 PM. From 8. to 12.,  $\Omega$ : PM.

- (1) **MAX: Maximum value** =  $\max(\Omega)$
- (2)  **$\sigma$ : standard deviation** =  $\sqrt{\frac{\sum_i (x_i - \bar{x})^2}{N}}$
- (3) **MAD: Median Absolute Deviation** =  $\text{median}(|x_i - \text{median}(\Omega)|)$
- (4)  **$m_{90th}$ : mean over the 90th percentile** =  $\text{mean}(x \in x_i \geq x_{90th})$
- (5)  **$M_{90th}$ : median over the 90th percentile** =  $\text{median}(x \in x_i \geq x_{90th})$
